# Supplementary material
Source: Research Square preprint supplement (doi:10.21203/rs.3.rs-9556534/v1)
Supplement: Supplementary file 1 [file dac331498bfcc1a30cbecbd6.docx]

Living Environmental Quality and Incident Cardiometabolic Multimorbidity: A Prospective Cohort Study in China

**Supplementary materials**

Table S1 The definition of living environmental quality score

Table S2 Association between Continuous LEQ and CMM in a cohort study

Table S3 Association between LEQ and incident CMM

Table S4 Association between LEQ and incident CMM

Table S5 Association between Living Environmental Factors and CMM

# Table S6 Association between LEQ and incident CMM excluding Hypertension

Table S7 Association between LEQ and incident CMM excluding Hypertension

Table S8 Associations Between LEQ and Incident CMM After Excluding Participants with CMM in 2013

Table S9 Associations Between LEQ and Incident CMM After Excluding Participants with CMM in 2013

# Table S10 Associations Between LEQ Excluding PM2.5 and Incident CMM

# Table S11 Associations Between LEQ Excluding PM2.5 and Incident CMM

# Table S12 Subgroup analysis of LEQ and CMM

Table S13 Subgroup analysis of LEQ and CMM

**Table S1. The definition of living environmental quality score**

| Component | Score of each component | Method of measurement |
| --- | --- | --- |
| Outdoor PM2.5 |  | Extracted from the ChinaHighAirPollutants (CHAP) dataset |
| PM2.5 (≥35 µg/m3) | 0 |
| PM2.5 (<35 µg/m3) | 1 |
| Household energy fuel |  | Measurement: Self-reported household fuel types  Examples of heating fuel measurement:  “What is the main heating energy source?”  Examples of cooking fuel measurement:  “What is the main source of cooking fuel?” |
| All solid | 0 |
| Mixed-fuel | 1 |
| All clean | 2 |
| Room type |  | Measurement: Self-reported building types Examples tools for measurement:  “Is the building one story or multi-level building, how many stories?” |
| One-storey building | 0 |
| Multi-storey building | 1 |
| Room temperature |  | Measurement: Interviewer-observed household temperature Examples tools for measurement:  How is the temperature in this household? |
| Unsuitable | 0 |
| Suitable | 1 |
| Water source |  | Measurement: Self-reported household water sources  Examples tools for measurement:  “Does your residence have running water?” |
| Non-tap water use | 0 |
| Tap water use | 1 |
| Living environmental quality score | Accumulation above points | The higher the score, the better the living environmental quality |

# Table S2 Association between Continuous LEQ and CMM in **a cohort study**

| **Variable** | **Model 1 HR**  **(95% CI)** | ***P*** | **Model 2 HR**  **(95% CI)** | ***P*** | **Model 3 HR**  **(95% CI)** | ***P*** |
| --- | --- | --- | --- | --- | --- | --- |
| LEQ Continuous | 0.83  (0.72–0.95) | 0.007 | 0.77  (0.67–0.90) | <0.001 | 0.74  (0.64–0.86) | <0.001 |

HR = Hazard Ratio; CI = Confidence Interval.Model 1: Crude model (LEQ Continuous only).Model 2: Adjusted for age, gender, marital status, education level, and family residence.Model 3: Fully adjusted for Model 2 variables plus smoking, drinking, BMI, sleep time, TG, HDL, LDL, CRP, TC, and hypertension.Reference groups: Gender (Male), Marital (Others), Education (Illiterate), Residence (Rural), Smoking (Non-smoker), Drinking (No), Hypertension (No).Interpretation of LEQ Continuous: The variable was coded as an ordinal variable with High risk=1, Middle risk=2, Low risk=3.

**Table S3 Association between LEQ and incident CMM (Logistic Regression Models)**

| **Variable** | **Model 1 OR**  **(95% CI)** | ***P*** | **Model 2 OR**  **(95% CI)** | ***P*** | **Model 3 OR**  **(95% CI)** | ***P*** |
| --- | --- | --- | --- | --- | --- | --- |
| LEQ Continuous | 0.889  (0.824–0.959) | 0.002 | 0.859  (0.791–0.933) | <0.001 | 0.832  (0.764–0.906) | <0.001 |

Odds ratios (ORs) and 95% confidence intervals (CIs) were estimated using logistic regression models. LEQ score was entered as an ordinal continuous variable, with higher values indicating better living environmental quality. Wald confidence intervals were used when model convergence issues were present. OR, odds ratio; CI, confidence interval.

**Table S4**  **Association between LEQ and incident CMM** **(Logistic Regression Models)**

| **Variable** | **Model 1 OR**  **(95% CI)** | ***P*** | **Model 2 OR**  **(95% CI)** | ***P*** | **Model 3 OR**  **(95% CI)** | ***P*** |
| --- | --- | --- | --- | --- | --- | --- |
| High risk (Ref.) | 1.00 | — | 1.00 | — | 1.00 | — |
| Middle risk | 0.88  (0.72–1.09) | 0.241 | 0.84  (0.68–1.04) | 0.112 | 0.78  (0.63–0.98) | 0.030 |
| Low risk | 0.57  (0.39–0.80) | 0.002 | 0.49  (0.329–0.70) | <0.001 | 0.44  (0.30–0.64) | <0.001 |
| P for trend | 0.003 | | <0.001 | | <0.001 | |

Odds ratios (ORs) and 95% confidence intervals (CIs) were estimated using logistic regression models.Due to fitted probabilities numerically 0 or 1 in Model 3, Wald confidence intervals (confint.default) were used.Lipid profiles (TG, HDL, LDL, TC) were measured in mg/dL and converted to mmol/L for analysis.

# Table S5 **Association between Living Environmental Factors and CMM**

| **Variable** | **Model 1 OR**  **(95% CI)** | ***P*** | **Model 2 OR**  **(95% CI)** | ***P*** | **Model 3 OR**  **(95% CI)** | ***P*** |
| --- | --- | --- | --- | --- | --- | --- |
| Room type  (Multi vs one) | 0.53  (0.41–0.68) | <0.001 | 0.51  (0.40–0.65) | <0.001 | 0.50  (0.39–0.64) | <0.001 |
| Room temperature  (Suitable vs Unsuitable) | 0.95  (0.73–1.24) | 0.709 | 0.95  (0.73–1.24) | 0.715 | 0.95  (0.72–1.25) | 0.719 |
| Water Source  (Tap vs Non-tap) | 0.79  (0.65–0.96) | 0.020 | 0.75  (0.61–0.92) | 0.006 | 0.74  (0.60–0.91) | 0.004 |
| Household energy fuel |  |  |  |  |  |  |
| Mixed fuel (vs Solid) | 0.99  (0.76–1.29) | 0.928 | 0.97  (0.74–1.26) | 0.809 | 0.92  (0.70–1.21) | 0.566 |
| All clean (vs Solid) | 0.97  (0.76–1.24) | 0.802 | 0.93  (0.71–1.21) | 0.580 | 0.83  (0.64–1.09) | 0.181 |
| Outdoor PM2.5  (<35 vs ≥35 μg/m³) | 0.97  (0.70–1.35) | 0.866 | 1.01  (0.73–1.41) | 0.932 | 0.99  (0.71–1.38) | 0.934 |

Robust standard errors and Wald confidence intervals were used to handle potential model convergence issues.Reference groups: Room type (One-storey), Room temperature (Unsuitable), Water source (Non-tap), Household energy fuel(Solid fuel), Outdoor PM2.5 (≥35 μg/m³).

**Table S6Association between LEQ and incident CMM excluding Hypertension**

| **Variable** | **Model 1 HR**  **(95% CI)** | ***P*** | **Model 2 HR**  **(95% CI)** | ***P*** | **Model 3 HR**  **(95% CI)** | ***P*** |
| --- | --- | --- | --- | --- | --- | --- |
| High risk | Reference | — | Reference | — | Reference | — |
| Middle risk | 0.97 (0.83-1.14) | 0.733 | 1.02 (0.86-1.20) | 0.853 | 0.97 (0.83-1.15) | 0.759 |
| Low risk | 0.70 (0.54-0.90) | 0.006 | 0.73 (0.56-0.96) | 0.025 | 0.70 (0.53-0.92) | 0.010 |
| P for trend |  | |  | | 0.036 | |

Note:HR, hazard ratio; CI, confidence interval;Model 1: Unadjusted. Model 2: Adjusted for age, gender, marital status, education level, and residence location (urban/rural). Model 3: Further adjusted for smoking status, drinking status, BMI, sleep duration, TG, HDL-C, LDL-C, CRP, and TC. P for trend was calculated using the median value of each LEQ category as a continuous variable.

**Table S7Association between LEQ and incident CMM excluding Hypertension**

| **Variable** | **Model 1 HR**  **(95% CI)** | ***P*** | **Model 2 HR**  **(95% CI)** | ***P*** | **Model 3 HR**  **(95% CI)** | ***P*** |
| --- | --- | --- | --- | --- | --- | --- |
| LEQ Continuous | 0.92 (0.87-0.98) | 0.007 | 0.94 (0.89-1.00) | 0.051 | 0.93 (0.87-0.99) | 0.018 |

Note:HR, hazard ratio; CI, confidence interval;Model 1: Unadjusted. Model 2: Adjusted for age, gender, marital status, education level, and residence location (urban/rural). Model 3: Further adjusted for smoking status, drinking status, BMI, sleep duration, TG, HDL-C, LDL-C, CRP, and TC. P for trend was calculated using the median value of each LEQ category as a continuous variable.

**Table S8 Associations Between LEQ and Incident CMM After Excluding Participants with CMM in 2013**

| **Variable** | **Model 1 HR**  **(95% CI)** | ***P*** | **Model 2 HR**  **(95% CI)** | ***P*** | **Model 3 HR**  **(95% CI)** | ***P*** |
| --- | --- | --- | --- | --- | --- | --- |
| High risk | Reference | — | Reference | — | Reference | — |
| Middle risk | 0.82 (0.67-1.00) | 0.053 | 0.81 (0.66-0.99) | 0.045 | 0.75 (0.61-0.93) | 0.008 |
| Low risk | 0.54 (0.39-0.77) | <0.001 | 0.50 (0.35-0.72) | <0.001 | 0.47 (0.32-0.68) | <0.001 |
| P for trend |  | |  | | <0.001 | |

P for trend was calculated using an ordinal variable (High risk=1, Middle risk=2, Low risk=3) in the fully adjusted model.

# Table S9 Associations Between LEQ and Incident CMM After Excluding Participants with CMM in 2013

| **Variable** | **Model 1 HR**  **(95% CI)** | ***P*** | **Model 2 HR**  **(95% CI)** | ***P*** | **Model 3 HR**  **(95% CI)** | ***P*** |
| --- | --- | --- | --- | --- | --- | --- |
| LEQ Continuous | 0.77 (0.67-0.89) | <0.001 | 0.75 (0.64-0.87) | <0.001 | 0.71 (0.61-0.83) | <0.001 |

LEQ score was entered as an ordinal continuous variable, with higher values indicating better living environmental quality.

**Table S10 Associations Between LEQ Excluding PM2.5 and Incident CMM**

| **Variable** | **Model 1 HR**  **(95% CI)** | ***P*** | **Model 2 HR**  **(95% CI)** | ***P*** | **Model 3 HR**  **(95% CI)** | ***P*** |
| --- | --- | --- | --- | --- | --- | --- |
| High risk | Reference | — | Reference | — | Reference | — |
| Middle risk | 0.96 (0.75-1.23) | 0.741 | 1.05 (0.71-1.56) | 0.798 | 1.04 (0.67-1.60) | 0.872 |
| Low risk | 0.72 (0.55-0.94) | 0.017 | 0.53 (0.31-0.90) | 0.018 | 0.52 (0.29-0.93) | 0.027 |
| P for trend |  | |  | | 0.021 | |

# **Table S11** Associations Between Continuous LEQ Excluding PM2.5 and Incident CMM

| **Variable** | **Model 1 HR**  **(95% CI)** | ***P*** | **Model 2 HR**  **(95% CI)** | ***P*** | **Model 3 HR**  **(95% CI)** | ***P*** |
| --- | --- | --- | --- | --- | --- | --- |
| LEQ Continuous | 0.83  (0.73–0.95) | 0.006 | 0.79  (0.69–0.91) | <0.001 | 0.76  (0.66–0.88) | <0.001 |

Interpretation of LEQ Continuous: The variable was coded as an ordinal variable with High risk=1, Middle risk=2, Low risk=3.

**Table S12 Subgroup analysis of LEQ and CMM**

| **Model** | **Subgroup** | **High risk**  **HR**  **(95% CI)** | **Middle risk**  **HR**  **(95% CI)** | ***P***  **value** | **Low risk**  **HR**  **(95% CI)** | ***P***  **value** | ***P***  **trend** | ***P* for interaction** |
| --- | --- | --- | --- | --- | --- | --- | --- | --- |
|  | Gender |  |  |  |  |  |  |  |
| Model 1 | female | 1.00(Reference) | 0.88 (0.69–1.11) | 0.274 | 0.61 (0.41–0.91) | 0.003 | <0.001 | 0.8842 |
|  | male | 1.00(Reference) | 0.89 (0.65–1.22) | 0.478 | 0.70 (0.42–1.16) | 0.168 | 0.04 |
| Model 2 | female | 1.00(Reference) | 0.83 (0.64–1.06) | 0.134 | 0.52 (0.34–0.80) | 0.003 | <0.001 |
|  | male | 1.00(Reference) | 0.86 (0.62–1.19) | 0.356 | 0.64 (0.37–1.10) | 0.107 | 0.04 |
| Model 3 | female | 1.00(Reference) | 0.79 (0.61–1.01) | 0.058 | 0.48 (0.31–0.73) | <0.001 | <0.001 |
|  | male | 1.00(Reference) | 0.76 (0.54–1.05) | 0.096 | 0.60 (0.34–1.04) | 0.069 | 0.04 |
|  | Age |  |  |  |  |  |  |  |
| Model 1 | <60 | 1.00(Reference) | 0.84 (0.64–1.10) | 0.195 | 0.68 (0.45–1.03) | 0.067 | 0.006 | 0.7646 |
|  | ≥60 | 1.00(Reference) | 0.98 (0.76–1.28) | 0.906 | 0.65 (0.40–1.06) | 0.083 | 0.005 |
| Model 2 | <60 | 1.00(Reference) | 0.78 (0.59–1.04) | 0.091 | 0.55 (0.36–0.87) | 0.009 | 0.006 |
|  | ≥60 | 1.00(Reference) | 0.91 (0.69–1.19) | 0.489 | 0.53 (0.31–0.89) | 0.016 | 0.005 |
| Model 3 | <60 | 1.00(Reference) | 0.77 (0.58–1.03) | 0.082 | 0.54 (0.34–0.85) | 0.007 | 0.006 |
|  | ≥60 | 1.00(Reference) | 0.81 (0.61–1.07) | 0.140 | 0.47 (0.28–0.79) | 0.004 | 0.005 |
|  | Family Residence | |  |  |  |  |  |  |
| Model 1 | Rural | 1.00(Reference) | 0.79 (0.63–0.99) | 0.045 | 0.30 (0.15–0.60) | <0.001 | <0.001 | 0.5675 |
|  | Urban | 1.00(Reference) | 0.94 (0.62–1.42) | 0.770 | 0.73 (0.46–1.18) | 0.199 | 0.12 |
| Model 2 | Rural | 1.00(Reference) | 0.81 (0.64–1.01) | 0.065 | 0.31 (0.15–0.64) | 0.001 | <0.001 |
|  | Urban | 1.00(Reference) | 0.99 (0.65–1.51) | 0.967 | 0.77 (0.47–1.25) | 0.295 | 0.12 |
| Model 3 | Rural | 1.00(Reference) | 0.75 (0.60–0.94) | 0.014 | 0.31 (0.15–0.64) | 0.001 | <0.001 |
|  | Urban | 1.00(Reference) | 0.91 (0.59–1.39) | 0.653 | 0.70 (0.42–1.14) | 0.150 | 0.12 |

**P trend:**P-value for trend test (LEQ score treated as an ordinal variable: High risk=0, Middle risk=1, Low isk=2).**P for interaction:**P-value for interaction between LEQ score and subgroup variable.

**Table S13. Subgroup analysis of LEQ and CMM**

| **Model** | **Subgroup** | **LEQ score continuous variable HR**  **(95% CI)** | ***P* value** | ***P* for interaction** |
| --- | --- | --- | --- | --- |
|  | Gender |  |  |  |
| Model 1 | female | 0.90 (0.82–0.98) | 0.012 | 0.703 |
|  | male | 0.91 (0.82–1.02) | 0.123 |
| Model 2 | female | 0.86 (0.78–0.95) | 0.002 |
|  | male | 0.89 (0.79–1.01) | 0.067 |
| Model 3 | female | 0.83 (0.76–0.92) | <0.001 |
|  | male | 0.86 (0.76–0.98) | 0.024 |
|  | Age |  |  |  |
| Model 1 | <60 | 0.92 (0.83–1.01) | 0.087 | 0.619 |
|  | ≥60 | 0.91 (0.83–1.00) | 0.058 |
| Model 2 | <60 | 0.87 (0.79–0.97) | 0.014 |
|  | ≥60 | 0.87 (0.78–0.96) | 0.007 |
| Model 3 | <60 | 0.87 (0.78–0.97) | 0.011 |
|  | ≥60 | 0.83 (0.74–0.92) | <0.001 |
|  | Family Residence |  |  |  |
| Model 1 | Rural | 0.82 (0.75–0.90) | <0.001 | 0.222 |
|  | Urban | 0.93 (0.82–1.05) | 0.226 |
| Model 2 | Rural | 0.83 (0.76–0.92) | <0.001 |
|  | Urban | 0.94 (0.83–1.07) | 0.365 |
| Model 3 | Rural | 0.81 (0.74–0.89) | <0.001 |
|  | Urban | 0.91 (0.80–1.03) | 0.143 |

P for interaction was derived from the cross-product term between LEQ score and the subgroup variable.
